# Supplementary material
Source: PubMed Central journal article supplement (PMC5885916)
Supplement: jamainternmed-178-328-s001.pdf [file jamainternmed-178-328-s001.pdf]

## Supplementary Online Content

Gunderson EP, Lewis CE, Lin Y, et al. Lactation duration and progression to diabetes in women across the childbearing years: the 30-year CARDIA Study. *JAMA Intern Med*. Published online January 16, 2018. doi:10.1001/jamainternmed.2017.7978

**eFigure 1.** Sample Selection Flow diagram: 1,238 of 2,787 CARDIA Black and White women aged 18 to 30 years at baseline, and without diabetes prior to one or more live, post-baseline births during the 30-Year follow-up (1986 to 2016) and cases of incident diabetes.

**eFigure 2.** Mean weight gain (kg) from baseline to end of follow-up (1986-2016; 30 years) among lactation categories and by incident diabetes status (Incident diabetes n =182, No diabetes n =1,156). Mean weight gain associated with lactation duration categories (p-value<0.001) did not differ for women with incident diabetes and without diabetes (p-interaction=0.99).

**eFigure 3.** Unadjusted and fully adjusted associations for covariates with the relative hazards of incident diabetes during the 30-year follow up period (1986-2016).

**eTable 1.** Baseline Characteristics (1985-1986) by Lactation Duration Categories (n=1,238)

**eTable 2.** Characteristics by Lactation Duration Categories (n =1,238 parous women) during the 30-Year Follow Up (1986 to 2016).

**eTable 3.** Unadjusted and Adjusted Relative Hazards (95%CI) of Incident Type 2 Diabetes during 30 Years of Follow up Among Lactation Duration Categories on Women Nulliparous at Baseline (n=848 total nulliparous women)

**eTable 4.** Unadjusted and Adjusted Relative Hazards (95%CI) of Incident Diabetes in Women per month of Lactation during 30-Year Follow up for All Women, and Stratified by Black Women and White Women. (Interaction p-value = 0.137)

This supplementary material has been provided by the authors to give readers additional information about their work.

**Supplemental Figure 1:** Sample Selection Flow diagram: 1,238 of 2,787 CARDIA Black and White women aged 18 to 30 years at baseline, and without diabetes prior to one or more live, post-baseline births during the 30-Year follow-up (1986 to 2016) and cases of incident diabetes.

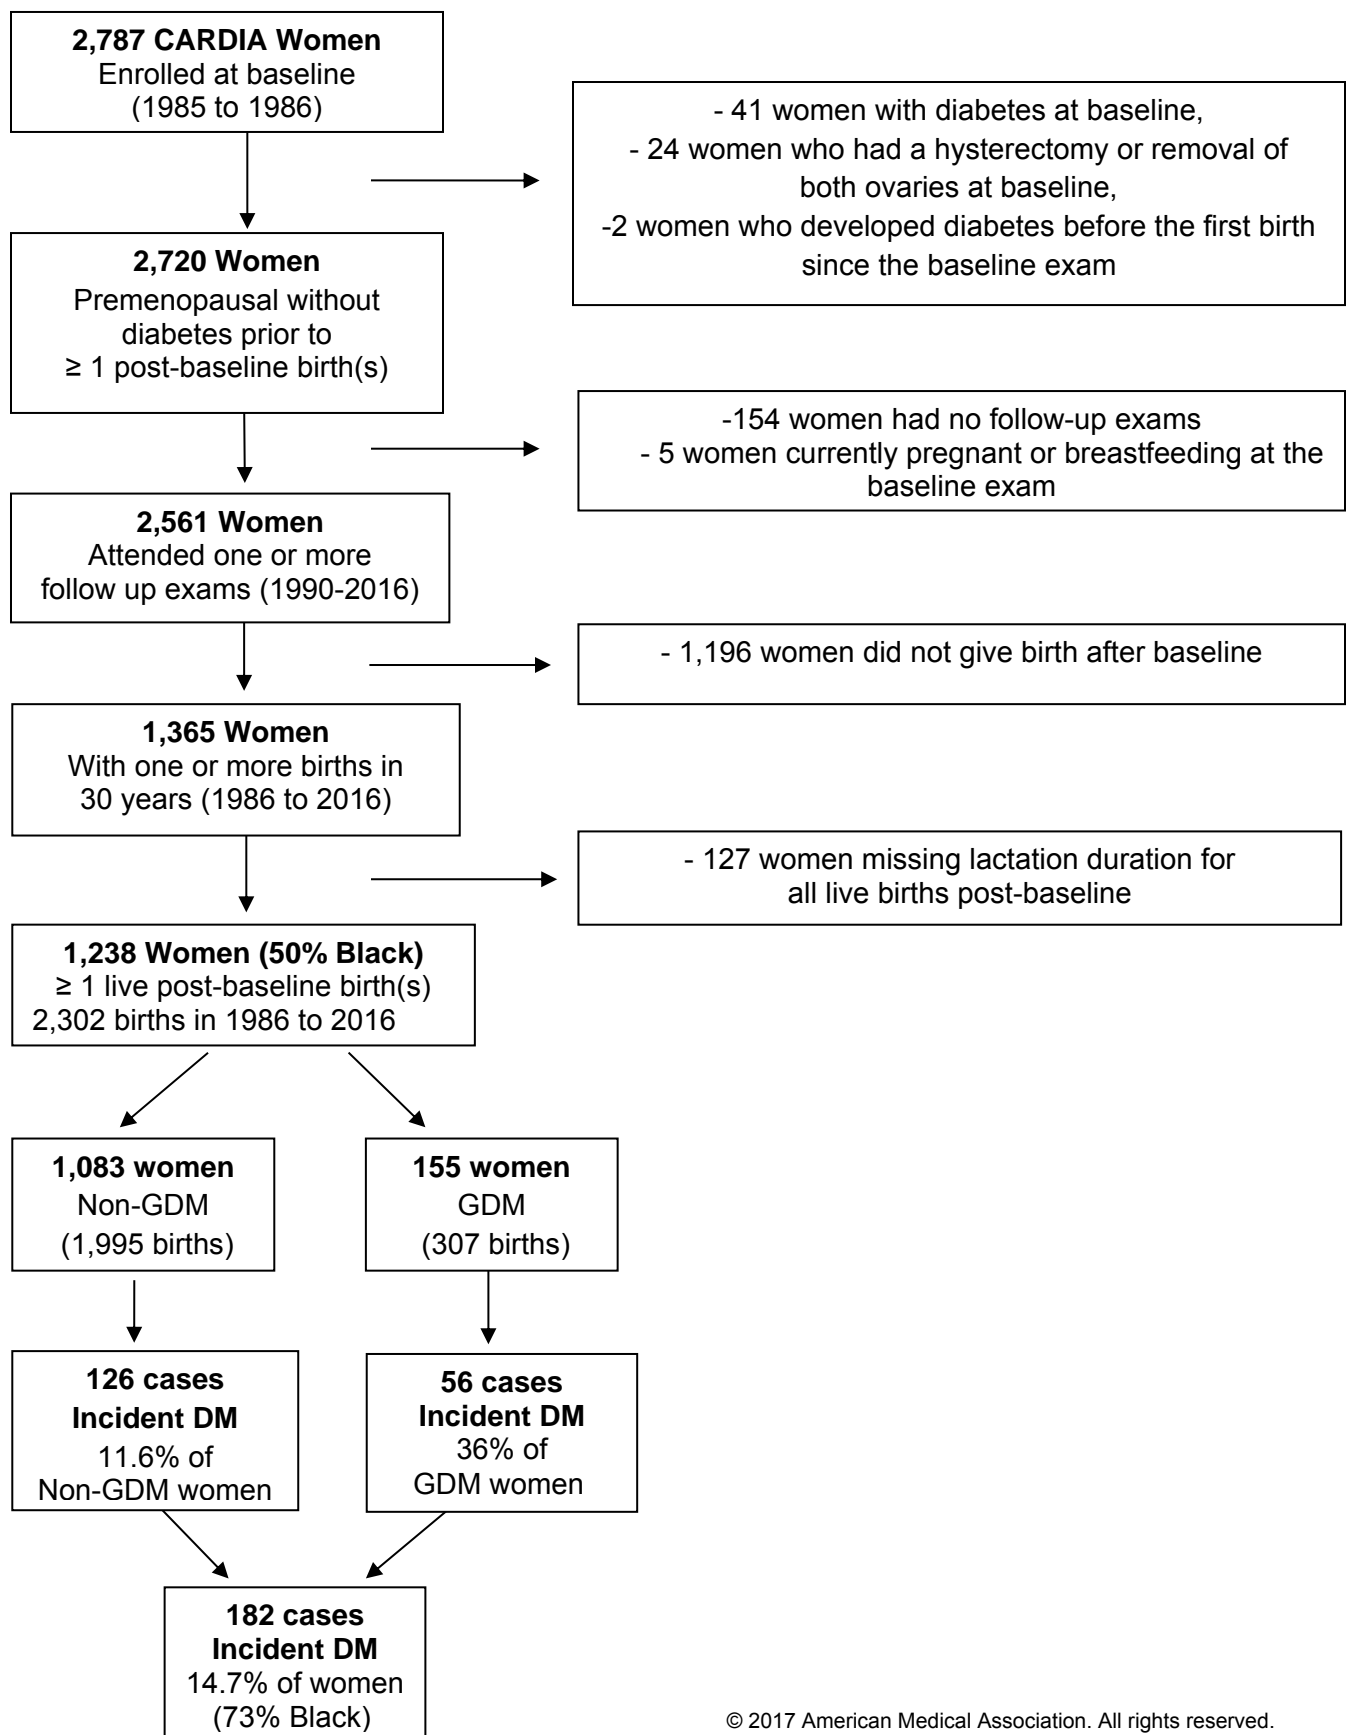

**Supplemental Figure 2:** Mean weight gain (kg) from baseline to end of follow-up (1986-2016; 30 years) among lactation categories and by incident diabetes status (Incident diabetes n =182, No diabetes n =1,156). Mean weight gain associated with lactation duration categories (p-value<0.001) did not differ for women with incident diabetes and without diabetes (p-interaction=0.99).

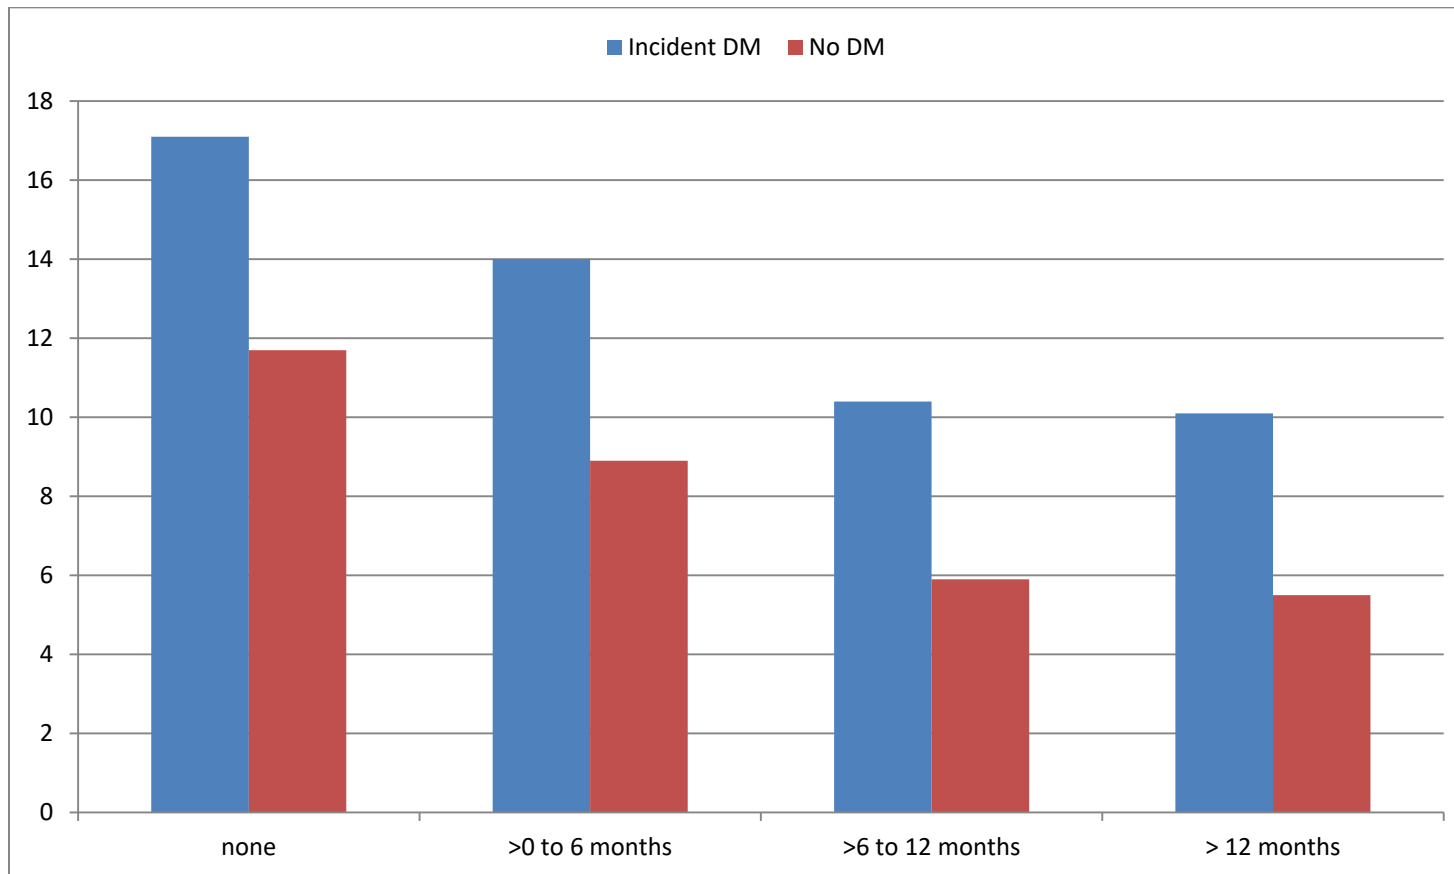

Supplemental Figure 3: Unadjusted and fully adjusted associations for covariates with the relative hazards of incident diabetes during the 30-year follow up period (1986-2016).

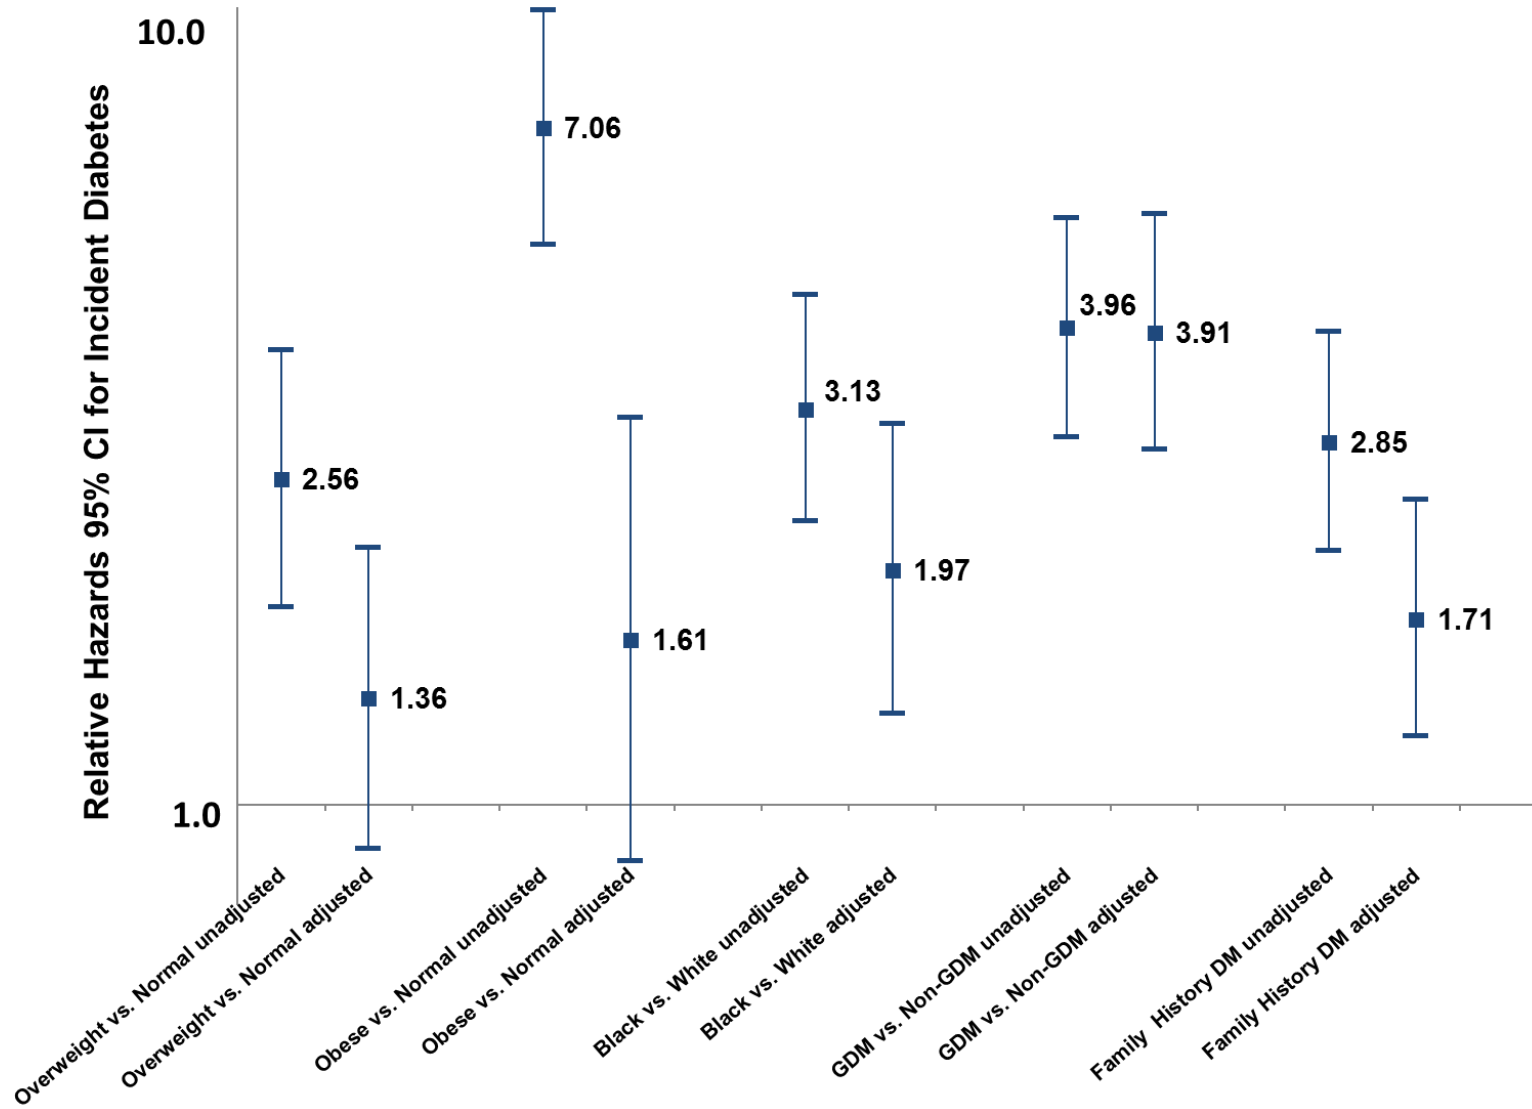

Table 1: Baseline Characteristics (1985-1986) by Lactation Duration Categories (n=1,238)

| Baseline Characteristics         | Lactation Duration Groups |                           |                             |                        | p-value |
|----------------------------------|---------------------------|---------------------------|-----------------------------|------------------------|---------|
|                                  | None<br>(n=322)           | >0 to 6 months<br>(n=418) | >6 to <12 months<br>(n=268) | ≥ 12 months<br>(n=230) |         |
|                                  | n (row %)                 |                           |                             |                        |         |
| Race (Black)                     | 252 (78.3)                | 215 (51.4)                | 93 (34.7)                   | 55 (23.9)              | <.001   |
| Parity (Nulliparous)             | 184 (57.1)                | 141 (33.7)                | 66 (24.6)                   | 44 (19.1)              | <.001   |
| Smoker (current)                 | 123 (38.2)                | 106 (25.4)                | 51 (19.0)                   | 39 (17.0)              | <.001   |
|                                  | Mean (SD)                 |                           |                             |                        |         |
| Age (years)                      | 23.4 (3.6)                | 24.2 (3.7)                | 24.4 (3.6)                  | 24.4 (3.8)             | 0.001   |
| Age at menarche (years)          | 12.5 (1.6)                | 12.5 (1.6)                | 12.6 (1.5)                  | 12.9 (1.7)             | 0.05    |
| BMI (kg/m <sup>2</sup> )         | 25.3 (6.3)                | 23.6 (4.7)                | 23.3 (4.4)                  | 22.2 (3.7)             | <.001   |
| Waist circumference (cm)         | 75.9 (12.7)               | 72.1 (9.5)                | 71.1 (9.0)                  | 69.7 (7.6)             | <.001   |
| Systolic blood pressure (mm Hg)  | 106.5 (9.7)               | 105.7 (8.5)               | 105.2 (9.3)                 | 104.9 (9.1)            | 0.19    |
| Diastolic blood pressure (mm Hg) | 66.1 (9.1)                | 65.8 (8.7)                | 65.4 (8.1)                  | 66.3 (8.3)             | 0.66    |
| Fasting mg/dL, Glucose           | 78.5 (8.3)                | 79.3 (7.8)                | 80.3 (7.2)                  | 79.4 (7.4)             | 0.06    |
| HDL-C                            | 53.8 (12.9)               | 56.0 (12.2)               | 58.0 (13.2)                 | 57.6 (12.4)            | <.001   |
| LDL-C                            | 112.2 (31.0)              | 107.3 (30.9)              | 108.3 (28.3)                | 103.5 (28.5)           | 0.01    |
| Total Cholesterol                | 179.6 (33.6)              | 176.3 (32.7)              | 179.2 (31.5)                | 173.3 (30.0)           | 0.10    |
| Triglycerides                    | 68.3 (33.0)               | 64.7 (28.9)               | 64.2 (46.9)                 | 61.0 (26.9)            | 0.11    |
| Dietary Intake:                  |                           |                           |                             |                        |         |
| % Energy (Kcal) from CHO         | 46.5 (7.8)                | 47.0 (7.1)                | 47.0 (7.0)                  | 47.4 (7.6)             | 0.50    |
| % Energy (Kcal) from Fat         | 38.4 (6.0)                | 37.4 (5.9)                | 36.8 (6.2)                  | 36.4 (6.1)             | <.001   |
| Dietary Quality Score            | 55.6 (11.1)               | 64.6 (12.6)               | 68.9 (12.7)                 | 69.5 (13.3)            | <.001   |
|                                  | Median (IQR)              |                           |                             |                        |         |
| HOMA-IR †                        | 1.9 (1.7)                 | 1.8 (1.3)                 | 1.6 (1.3)                   | 1.5 (1.2)              | <.001   |
| Crude Fiber (g)/1000 Kcal †      | 1.8 (0.8)                 | 2.3 (1.1)                 | 2.4 (1.0)                   | 2.7 (1.4)              | <.001   |
| Alcohol Intake (ml/day) †        | 2.4 (7.9)                 | 2.4 (7.8)                 | 2.4 (10.6)                  | 2.4 (9.7)              | 0.11    |
| Physical activity score †        | 233.0 (305.0)             | 291.0 (320.0)             | 350.5 (348.5)               | 360.0 (336.0)          | <.001   |

† Kruskal-Wallis test; CHO = carbohydrate, Kcal = Kilocalories, HOMA-IR= homeostatic model assessment of insulin resistance; Fasting serum glucose at Year 0 (baseline) for n=1,213 women, and Year 7 before DM onset for n=10 women (all values < 100 mg/dL), and missing for n=5 women.

Table 2: Characteristics by Lactation Duration Categories (n =1,238 parous women) during the 30-Year Follow Up (1986 to 2016).

| Follow-up (Up to Year 30)<br>Characteristics | Lactation Duration Categories |                           |                            |                       | p-value |
|----------------------------------------------|-------------------------------|---------------------------|----------------------------|-----------------------|---------|
|                                              | None<br>(n=322)               | >0 to 6 months<br>(n=418) | >6 to<12 months<br>(n=268) | ≥12 months<br>(n=230) |         |
|                                              |                               |                           | n (%)                      |                       |         |
| Education (high school or less)              | 86 (26.7)                     | 49 (11.7)                 | 16 (6.0)                   | 9 (3.9)               | <.001   |
| Post-menopausal                              | 166 (51.6)                    | 230 (55.0)                | 161 (60.1)                 | 127 (55.2)            | 0.23    |
| <u>Perinatal Outcomes</u>                    |                               |                           |                            |                       |         |
| Births Post-baseline:                        |                               |                           |                            |                       |         |
| 1 birth                                      | 171 (53.1)                    | 227 (54.3)                | 99 (36.9)                  | 12 (5.2)              | <.001   |
| 2 births                                     | 94 (29.2)                     | 144 (34.4)                | 127 (47.4)                 | 125 (54.3)            | <.001   |
| 3 or more                                    | 57 (17.7)                     | 47 (11.2)                 | 42 (15.7)                  | 93 (40.4)             | <.001   |
| Gestational hypertensive disorders           | 82 (25.5)                     | 104 (24.9)                | 63 (23.5)                  | 57 (24.8)             | 0.96    |
| History of GDM (ever)                        | 43 (13.4)                     | 43 (10.3)                 | 34 (12.7)                  | 35 (15.2)             | 0.30    |
| Preterm birth (< 37 weeks)                   | 70 (21.8)                     | 77 (18.6)                 | 41 (15.5)                  | 38 (16.6)             | 0.22    |
| Cesarean section                             | 106 (32.9)                    | 122 (29.2)                | 78 (29.1)                  | 62 (27.0)             | 0.47    |
| <u>Medical conditions/ medication use</u>    |                               |                           |                            |                       |         |
| Anti-hypertensive medications                | 123 (38.2)                    | 119 (28.5)                | 42 (15.7)                  | 45 (19.6)             | <.001   |
| Lipid lowering medications                   | 68 (21.1)                     | 64 (15.3)                 | 33 (12.3)                  | 24 (10.4)             | 0.002   |
| Incident metabolic syndrome                  | 69 (21.4)                     | 58 (13.9)                 | 20 (7.5)                   | 14 (6.1)              | <.001   |
| Family history of diabetes                   | 172 (53.4)                    | 188 (45.0)                | 119 (44.4)                 | 83 (36.1)             | <.001   |
|                                              |                               |                           | Mean (SD)                  |                       |         |
| Age (years)                                  | 48.2 (7.9)                    | 51.0 (7.2)                | 51.7 (7.0)                 | 52.0 (6.5)            | <.001   |
| BMI, kg/m <sup>2</sup>                       | 32.9 (8.6)                    | 30.8 (8.2)                | 29.2 (7.2)                 | 28.0 (7.1)            | <.001   |
| Weight change, kg                            | 20.7 (17.1)                   | 19.6 (16.3)               | 15.8 (15.6)                | 15.5 (15.6)           | <.001   |
| Smoking (pack-years)                         | 6.2 (9.6)                     | 3.8 (7.2)                 | 3.1 (7.9)                  | 2.1 (5.6)             | <.001   |
| Dietary Quality Score                        | 58.9 (9.6)                    | 67.6 (10.9)               | 71.7 (10.9)                | 72.1 (10.2)           | <.001   |
|                                              |                               |                           | Median (IQR)               |                       |         |
| Weight change (kg) †                         | 20.7 (17.1)                   | 19.6 (16.3)               | 15.8 (15.6)                | 15.5 (15.6)           | <.001   |
| Physical activity change †                   | - 72.5 (304.0)                | - 48.0 (328.0)            | - 57.0 (336.0)             | - 83.0 (281.0)        | 0.46    |
| Lactation duration, all births (months)†     | 0.0 (0.0)                     | 2.9 (3.1)                 | 7.9 (1.0)                  | 15.8 (5.4)            | <.001   |

† Kruskal-Wallis test; ‡ A *Priori* Dietary Quality score average of exam Years 0, 7 and 20.

Supplemental Table 3: Unadjusted and Adjusted Relative Hazards (95%CI) of Incident Type 2 Diabetes during 30 Years of Follow up Among Lactation Duration Categories on Women Nulliparous at Baseline (n=848 total nulliparous women)

| Models                                                                                                                       | Time Dependent Lactation Duration Categories |                              |                               |                         | p-value trend |
|------------------------------------------------------------------------------------------------------------------------------|----------------------------------------------|------------------------------|-------------------------------|-------------------------|---------------|
|                                                                                                                              | None<br>(n = 157)                            | > 0 to 6 months<br>(n = 296) | > 6 to 12 months<br>(n = 202) | >12 months<br>(n = 193) |               |
| <b>Model 1</b> Unadjusted                                                                                                    | 1.00<br>referent                             | 0.50<br>(0.32, 0.78)         | 0.36<br>(0.21, 0.62)          | 0.26<br>(0.14, 0.49)    | < 0.001       |
| <b>Model 2 = M1</b> + Adjusted for race time-dependent parity and GDM status during follow up                                | 1.00<br>referent                             | 0.65<br>(0.41, 1.03)         | 0.54<br>(0.30, 0.95)          | 0.38<br>(0.19, 0.76)    | 0.008         |
| <b>Model 3 = M2</b> + age, baseline covariates: BMI, waist circumference, and fasting glucose and family history of diabetes | 1.00<br>referent                             | 0.83<br>(0.51, 1.34)         | 0.61<br>(0.34, 1.10)          | 0.46<br>(0.23, 0.95)    | 0.022         |
| <b>Model 4 = M3</b> + time-dependent physical activity score and diet quality behaviors                                      | 1.00<br>referent                             | 0.71<br>(0.42, 1.20)         | 0.52<br>(0.28, 0.98)          | 0.44<br>(0.21, 0.94)    | 0.019         |
| <b>Model 5 = M4</b> + time-dependent weight change during follow-up                                                          | 1.00<br>referent                             | 0.66<br>(0.39, 1.10)         | 0.50<br>(0.27, 0.94)          | 0.44<br>(0.21, 0.93)    | 0.023         |

There is no evidence of effect modification by race, GDM status, or parity groups. All p-values >0.16  
n=2 women are missing fasting serum glucose at baseline and year 7,  
n= 1 woman is missing follow up physical activity score, and n= 7 women are missing average diet quality score.

Supplemental Table 4: Unadjusted and Adjusted Relative Hazards (95%CI) of Incident Diabetes in Women per month of Lactation during 30-Year Follow up for All Women, and Stratified by Black Women and White Women. (Interaction p-value = 0.137)

| Model Covariates                                                                                                              | ALL women<br>N=1,238                     |         | Black Race<br>N=615                      |         | White Race<br>N=623                      |         |
|-------------------------------------------------------------------------------------------------------------------------------|------------------------------------------|---------|------------------------------------------|---------|------------------------------------------|---------|
|                                                                                                                               | RH per month<br>of lactation,<br>(95%CI) | p-trend | RH per month<br>of lactation,<br>(95%CI) | p-trend | RH per month<br>of lactation,<br>(95%CI) | p-trend |
| <b>Model 1</b> Unadjusted                                                                                                     | 0.928<br>(0.900-0.956)                   | <.0001  | 0.974<br>(0.937-1.01)                    | 0.170   | 0.935<br>(0.889-0.983)                   | 0.009   |
| <b>Model 2 = M1</b> + Adjusted for race, time-dependent parity and GDM status during follow up                                | 0.954<br>(0.925-0.984)                   | 0.003   | 0.972<br>(0.934-1.01)                    | 0.146   | 0.927<br>(0.880-0.976)                   | 0.004   |
| <b>Model 3 = M2</b> + Age, baseline covariates: (BMI, waist circumference and fasting glucose) and family history of diabetes | 0.957<br>(0.927-0.988)                   | 0.007   | 0.972<br>(0.933-1.01)                    | 0.171   | 0.954<br>(0.905-1.00)                    | 0.074   |
| <b>Model 4 = M3</b> + time-dependent physical activity scores and diet quality score (behaviors)                              | 0.959<br>(0.927-0.992)                   | 0.015   | 0.970<br>(0.928-1.01)                    | 0.183   | 0.956<br>(0.905-1.01)                    | 0.102   |
| <b>Model 5 = M4</b> + time-dependent weight change during follow-up                                                           | 0.961<br>(0.929-0.993)                   | 0.017   | 0.970<br>(0.927-1.01)                    | 0.182   | 0.957<br>(0.908-1.01)                    | 0.100   |

Covariates: Time-dependent weight gain = weight gain above the median versus at or below from baseline through end of follow-up. Time-dependent physical activity score for race-specific quartiles; *A Priori* Diet Quality score evaluated as the average of the baseline and follow up exam scores; Years 0, 7 and 20.
